# Supplementary material for: Learning-Induced Gene Expression in the Hippocampus Reveals a Role of Neuron -Astrocyte Metabolic Coupling in Long Term Memory
Source: PubMed Central journal article supplement (PMC4625956; doi:10.1371/journal.pone.0141568), 2015-10-29
Supplement: pone.0141568.s001.pdf [file pone.0141568.s001.pdf]

## S1 Table:

### Gene expression analysis in the somatosensory cortex

| <b>CS</b>            | <b>CS-US</b>         |              |
|----------------------|----------------------|--------------|
| <i>Mean ± SEM, N</i> | <i>Mean ± SEM, N</i> | <i>t, df</i> |

#### **Astrocyte Neuron Lactate Shuttle**

|             |                   |                   |                |
|-------------|-------------------|-------------------|----------------|
| Ldha        | 1.000 ± 0.088 N=7 | 1.067 ± 0.072 N=8 | t=0.593, df=13 |
| Ldhb        | 1.000 ± 0.095 N=7 | 1.184 ± 0.084 N=8 | t=1.455, df=13 |
| MCT1        | 1.000 ± 0.044 N=7 | 0.986 ± 0.030 N=8 | t=0.276, df=13 |
| MCT2        | 1.000 ± 0.056 N=7 | 0.922 ± 0.031 N=8 | t=1.258, df=13 |
| MCT4        | 1.000 ± 0.080 N=7 | 0.990 ± 0.059 N=8 | t=0.100, df=13 |
| Glut1       | 1.000 ± 0.062 N=7 | 0.980 ± 0.031 N=8 | t=0.306, df=13 |
| Glut3       | 1.000 ± 0.073 N=7 | 1.066 ± 0.090 N=8 | t=0.556, df=13 |
| Na/K alpha2 | 1.000 ± 0.039 N=7 | 0.898 ± 0.082 N=8 | t=1.074, df=13 |
