# Supplementary material for: Learning-Induced Gene Expression in the Hippocampus Reveals a Role of Neuron -Astrocyte Metabolic Coupling in Long Term Memory
Source: PubMed Central journal article supplement (PMC4625956; doi:10.1371/journal.pone.0141568), 2015-10-29
Supplement: pone.0141568.s002.pdf [file pone.0141568.s002.pdf]

## S2 Table:

Shock alone does not induce the expression of genes related to ANLS

| <i>US (Shock only)</i> | <i>CS</i>            |              |
|------------------------|----------------------|--------------|
| <i>Mean ± SEM, N</i>   | <i>Mean ± SEM, N</i> | <i>t, df</i> |

### *Astrocyte Neuron Lactate Shuttle*

|             |                          |                          |                       |
|-------------|--------------------------|--------------------------|-----------------------|
| Ldha        | <i>0.985 ± 0.030 N=8</i> | <i>1.000 ± 0.025 N=8</i> | <i>t=0.383, df=14</i> |
| Ldhb        | <i>1.153 ± 0.054 N=8</i> | <i>1.000 ± 0.047 N=8</i> | <i>t=2.135, df=14</i> |
| MCT1        | <i>1.002 ± 0.026 N=8</i> | <i>1.000 ± 0.040 N=8</i> | <i>t=0.034, df=14</i> |
| MCT2        | <i>1.043 ± 0.025 N=8</i> | <i>1.000 ± 0.026 N=8</i> | <i>t=1.182, df=14</i> |
| MCT4        | <i>0.965 ± 0.058 N=8</i> | <i>1.000 ± 0.132 N=8</i> | <i>t=0.241, df=14</i> |
| Glut1       | <i>1.084 ± 0.045 N=8</i> | <i>1.000 ± 0.042 N=8</i> | <i>t=1.362, df=14</i> |
| Glut3       | <i>1.080 ± 0.088 N=8</i> | <i>1.000 ± 0.069 N=8</i> | <i>t=0.716, df=14</i> |
| Na/K alpha2 | <i>1.127 ± 0.098 N=8</i> | <i>1.000 ± 0.037 N=8</i> | <i>t=1.209, df=14</i> |
